# Supplementary material for: Virtual Screening for Biomimetic Anti-Cancer Peptides from Cordyceps militaris Putative Pepsinized Peptidome and Validation on Colon Cancer Cell Line
Source: MDPI journal article supplement (doi:10.3390/molecules26195767), 2021-09-23
Supplement: s1 [file s1]

Supplementary Material

# Virtual Screening for Biomimetic Anti-Cancer Peptides from *Cordyceps militaris* Putative Pepsinized Peptidome and Validation on Colon Cancer Cell Line

Jarinyagon Chantawannakul<sup>1</sup>, Paninnuch Chatpattanasiri<sup>1</sup>, Vichugorn Wattayagorn<sup>2</sup>, Mesayamas Kongsema<sup>2</sup>, Tipanart Noikaew<sup>3,\*</sup> and Pramote Chumnanpuen<sup>2,4,\*</sup>

<sup>1</sup> Mahidol Wittayanusorn School, 364 Salaya, Phuttamonthon District, Nakhon Prathom 73170, Thailand; kiwi.jarinyagon@gmail.com (J.C.); paninnuch.1@gmail.com (P.C.)

<sup>2</sup> Department of Zoology, Faculty of Science, Kasetsart University, Bangkok 10900, Thailand; vichugorn.wa@ku.th (V.W.); fscimmk@ku.ac.th (M.K.)

<sup>3</sup> Department of Biology and Health Science, Mahidol Wittayanusorn School, 364 Salaya, Phuttamonthon District, Nakhon Prathom 73170, Thailand

<sup>4</sup> Omics Center for Agriculture, Bioresources, Food and Health, Kasetsart University (OmiKU), Bangkok 10900, Thailand

\* Correspondence: tipanart.noi@mwit.ac.th (T.N.); pramote.c@ku.th (P.C.)

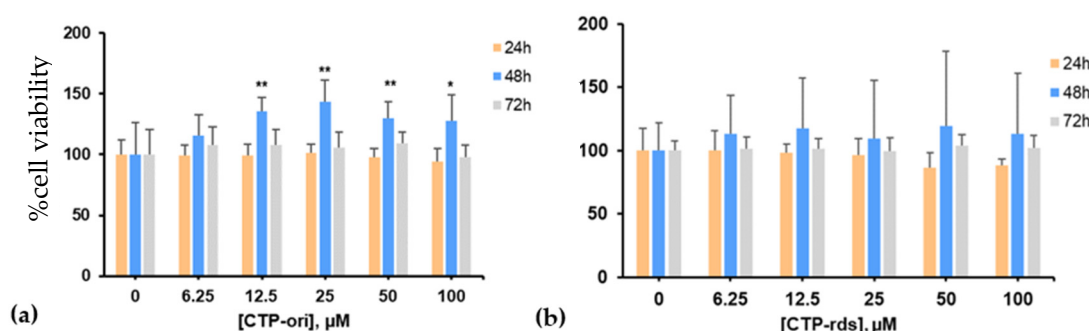

**Figure S1.** The effect of (a) CTP-ori and (b) CTP-rds against HT-29 cell viability assessed by MTT Assay. (\* $p < 0.05$ , \*\* $p < 0.01$ ).

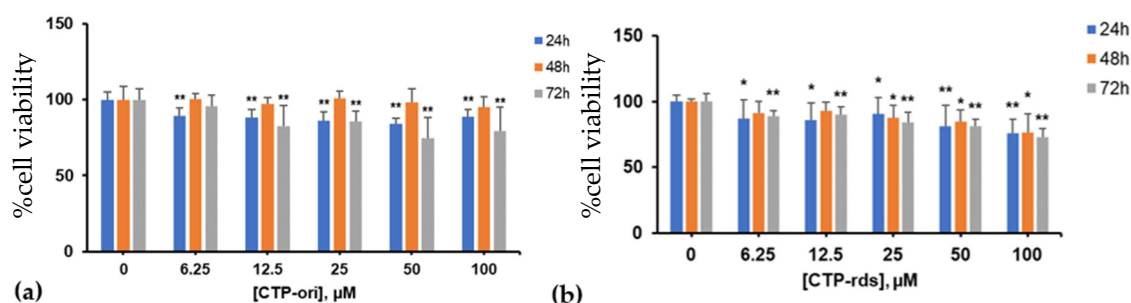

**Figure S2.** The effect of (a) CTP-ori and (b) CTP-rds against fibroblast cell viability assessed by MTT Assay. (\* $p < 0.05$ , \*\* $p < 0.01$ ).
